# Supplementary material
Source: PubMed Central journal article supplement (PMC7773145)
Supplement: NIHMS1655377-supplement-3.pdf [file NIHMS1655377-supplement-3.pdf]

- 25 [Reference appeared in supplementary materials only]
- 26 27. D. F. Levinson *et al.*, Copy number variants in schizophrenia: confirmation of five previous  
27 findings and new evidence for 3q29 microdeletions and VIPR2 duplications. *Am J Psychiatry*  
28 **168**, 302-316 (2011).
- 29 28. F. J. Muller *et al.*, A bioinformatic assay for pluripotency in human cells. *Nature methods* **8**,  
30 315-317 (2011).
- 31 29. U. Weissbein, M. Schachter, D. Egli, N. Benvenisty, Analysis of chromosomal aberrations and  
32 recombination by allelic bias in RNA-Seq. *Nat Commun* **7**, 12144 (2016).

- 1 30. Z. Wen *et al.*, Synaptic dysregulation in a human iPSC cell model of mental disorders. *Nature*
- 2 **515**, 414-418 (2014).
- 3 31. Y. Zhang *et al.*, Rapid single-step induction of functional neurons from human pluripotent
- 4 stem cells. *Neuron* **78**, 785-798 (2013).
- 5 32. N. Barretto *et al.*, ASCL1- and DLX2-induced GABAergic neurons from hiPSC-derived NPCs. *J*
- 6 *Neurosci Methods* **334**, 108548 (2020).
- 7 33. R. Gonzalez *et al.*, Deriving dopaminergic neurons for clinical use. A practical approach. *Sci*
- 8 *Rep* **3**, 1463 (2013).
- 9 34. Y. Liao, G. K. Smyth, W. Shi, The R package Rsubread is easier, faster, cheaper and better for
- 10 alignment and quantification of RNA sequencing reads. *Nucleic Acids Res.* (2019).
- 11 35. K. D. Hansen, R. A. Irizarry, Z. Wu, Removing technical variability in RNA-seq data using
- 12 conditional quantile normalization. *Biostatistics* **13**, 204-216 (2012).
- 13 36. N. L. Bray, H. Pimentel, P. Melsted, L. Pachter, Near-optimal probabilistic RNA-seq
- 14 quantification. *Nat Biotechnol* **34**, 525-527 (2016).
- 15 37. G. E. Hoffman *et al.*, Transcriptional signatures of schizophrenia in hiPSC-derived NPCs and
- 16 neurons are concordant with post-mortem adult brains. *Nat Commun* **8**, 2225 (2017).
- 17 38. K. L. Ring *et al.*, Direct reprogramming of mouse and human fibroblasts into multipotent
- 18 neural stem cells with a single factor. *Cell Stem Cell* **11**, 100-109 (2012).
- 19
- 20 39. P. Srikanth *et al.*, Genomic DISC1 Disruption in hiPSCs Alters Wnt Signaling and Neural Cell
- 21 Fate. *Cell Rep* **12**, 1414-1429 (2015).
- 22 40. R. M. Kuhn, D. Haussler, W. J. Kent, The UCSC genome browser and associated tools. *Brief*
- 23 *Bioinform* **14**, 144-161 (2013).
- 24 41. G. Jun *et al.*, Detecting and estimating contamination of human DNA samples in sequencing
- 25 and array-based genotype data. *Am J Hum Genet* **91**, 839-848 (2012).
- 26 42. D. Li *et al.*, Chromatin Accessibility Dynamics during iPSC Reprogramming. *Cell Stem Cell* **21**,
- 27 819-833 e816 (2017).
- 28 43. A. McKenna *et al.*, The Genome Analysis Toolkit: a MapReduce framework for analyzing
- 29 next-generation DNA sequencing data. *Genome research* **20**, 1297-1303 (2010).
- 30 44. B. van de Geijn, G. McVicker, Y. Gilad, J. K. Pritchard, WASP: allele-specific software for
- 31 robust molecular quantitative trait locus discovery. *Nature methods* **12**, 1061-1063 (2015).
- 32 45. J. D. Storey, R. Tibshirani, Statistical significance for genomewide studies. *Proc Natl Acad Sci*
- 33 *USA* **100**, 9440-9445 (2003).

- 1 46. E. Grundberg *et al.*, Mapping cis- and trans-regulatory effects across multiple tissues in  
2 twins. *Nat Genet* **44**, 1084-1089 (2012).
- 3 47. C. Y. McLean *et al.*, GREAT improves functional interpretation of cis-regulatory regions. *Nat*  
4 *Biotechnol* **28**, 495-501 (2010).
- 5 48. C. Roadmap Epigenomics *et al.*, Integrative analysis of 111 reference human epigenomes.  
6 *Nature* **518**, 317-330 (2015).
- 7 49. S. Heinz *et al.*, Simple combinations of lineage-determining transcription factors prime cis-  
8 regulatory elements required for macrophage and B cell identities. *Mol Cell* **38**, 576-589  
9 (2010).
- 10 50. A. Visel, S. Minovitsky, I. Dubchak, L. A. Pennacchio, VISTA Enhancer Browser--a database of  
11 tissue-specific human enhancers. *Nucleic Acids Res* **35**, D88-92 (2007).
- 12 51. S. K. Reilly *et al.*, Evolutionary genomics. Evolutionary changes in promoter and enhancer  
13 activity during human corticogenesis. *Science* **347**, 1155-1159 (2015).
- 14 52. J. Ernst, M. Kellis, Large-scale imputation of epigenomic datasets for systematic annotation  
15 of diverse human tissues. *Nat Biotechnol* **33**, 364-376 (2015).
- 16 53. N. C. Yeo *et al.*, An enhanced CRISPR repressor for targeted mammalian gene regulation.  
17 *Nature methods* **15**, 611-616 (2018).
- 18 54. M. H. Sung, M. J. Guertin, S. Baek, G. L. Hager, DNase footprint signatures are dictated by  
19 factor dynamics and DNA sequence. *Mol Cell* **56**, 275-285 (2014).
- 20 55. E. G. Gusmao, M. Allhoff, M. Zenke, I. G. Costa, Analysis of computational footprinting  
21 methods for DNase sequencing experiments. *Nature methods* **13**, 303-309 (2016).
- 22 56. G. Davey Smith, G. Hemani, Mendelian randomization: genetic anchors for causal inference  
23 in epidemiological studies. *Hum Mol Genet* **23**, R89-98 (2014).
- 24 57. G. McVicker *et al.*, Identification of genetic variants that affect histone modifications in  
25 human cells. *Science* **342**, 747-749 (2013).
- 26 58. S. Gupta, J. A. Stamatoyannopoulos, T. L. Bailey, W. S. Noble, Quantifying similarity between  
27 motifs. *Genome Biol* **8**, R24 (2007).
- 28 59. X. Wen, Molecular QTL discovery incorporating genomic annotations using Bayesian false  
29 discovery rate control. *Ann Appl Stat* **10**, (2016).
- 30 60. T. Berisa, J. K. Pickrell, Approximately independent linkage disequilibrium blocks in human  
31 populations. *Bioinformatics* **32**, 283-285 (2016).
- 32 61. S. Xie, J. Duan, B. Li, P. Zhou, G. C. Hon, Multiplexed Engineering and Analysis of  
33 Combinatorial Enhancer Activity in Single Cells. *Mol Cell* **66**, 285-299 e285 (2017).

- 1 62. C. Sonesson, M. D. Robinson, Bias, robustness and scalability in single-cell differential  
2 expression analysis. *Nature methods* **15**, 255-261 (2018).
- 3 63. F. A. Ran *et al.*, Genome engineering using the CRISPR-Cas9 system. *Nature protocols* **8**,  
4 2281-2308 (2013).
- 5 64. A. R. Wood *et al.*, Defining the role of common variation in the genomic and biological  
6 architecture of adult human height. *Nat Genet* **46**, 1173-1186 (2014).
- 7 65. A. E. Locke *et al.*, Genetic studies of body mass index yield new insights for obesity biology.  
8 *Nature* **518**, 197-206 (2015).
- 9 66. J. Z. Liu *et al.*, Association analyses identify 38 susceptibility loci for inflammatory bowel  
10 disease and highlight shared genetic risk across populations. *Nat Genet* **47**, 979-986 (2015).
- 11 67. A. P. Morris *et al.*, Large-scale association analysis provides insights into the genetic  
12 architecture and pathophysiology of type 2 diabetes. *Nat Genet* **44**, 981-990 (2012).
- 13 68. F. Demenais *et al.*, Multiancestry association study identifies new asthma risk loci that  
14 colocalize with immune-cell enhancer marks. *Nat Genet* **50**, 42-53 (2018).
- 15 69. J. Bentham *et al.*, Genetic association analyses implicate aberrant regulation of innate and  
16 adaptive immunity genes in the pathogenesis of systemic lupus erythematosus. *Nat Genet*  
17 **47**, 1457-1464 (2015).
- 18 70. C. J. Willer *et al.*, Discovery and refinement of loci associated with lipid levels. *Nat Genet* **45**,  
19 1274-1283 (2013).
- 20 71. N. R. Wray *et al.*, Genome-wide association analyses identify 44 risk variants and refine the  
21 genetic architecture of major depression. *Nat Genet* **50**, 668-681 (2018).
- 22 72. J. Grove *et al.*, Identification of common genetic risk variants for autism spectrum disorder.  
23 *Nat Genet* **51**, 431-444 (2019).
- 24 73. J. E. Savage *et al.*, Genome-wide association meta-analysis in 269,867 individuals identifies  
25 new genetic and functional links to intelligence. *Nat Genet* **50**, 912-919 (2018).
- 26 74. A. Okbay *et al.*, Genome-wide association study identifies 74 loci associated with  
27 educational attainment. *Nature* **533**, 539-542 (2016).
- 28 75. M. Nagel *et al.*, Meta-analysis of genome-wide association studies for neuroticism in 449,484  
29 individuals identifies novel genetic loci and pathways. *Nat Genet* **50**, 920-927 (2018).
- 30 76. I. E. Jansen *et al.*, Genome-wide meta-analysis identifies new loci and functional pathways  
31 influencing Alzheimer's disease risk. *Nat Genet* **51**, 404-413 (2019).
- 32 77. H. Iwaki *et al.*, Genome-wide association study of Parkinson's disease progression  
33 biomarkers in 12 longitudinal patients' cohorts. *bioRxiv*, (2019).

- 1 78. H. R. Taal *et al.*, Common variants at 12q15 and 12q24 are associated with infant head  
2 circumference. *Nat Genet* **44**, 532-538 (2012).
- 3 79. A. Obri *et al.*, ANP32E is a histone chaperone that removes H2A.Z from chromatin. *Nature*  
4 **505**, 648-653 (2014).
- 5 80. A. Takata, N. Matsumoto, T. Kato, Genome-wide identification of splicing QTLs in the human  
6 brain and their enrichment among schizophrenia-associated loci. *Nat Commun* **8**, 14519  
7 (2017).
- 8 81. C. Vidal *et al.*, Amyloid beta perturbs elevated heme flux induced with neuronal  
9 development. *Alzheimers Dement (N Y)* **5**, 27-37 (2019).
- 10 82. B. Ugur *et al.*, The Krebs Cycle Enzyme Isocitrate Dehydrogenase 3A Couples Mitochondrial  
11 Metabolism to Synaptic Transmission. *Cell Rep* **21**, 3794-3806 (2017).
- 12 83. N. Le *et al.*, Nab proteins are essential for peripheral nervous system myelination. *Nat*  
13 *Neurosci* **8**, 932-940 (2005).
- 14 84. S. M. Park, J. T. Littleton, H. R. Park, J. H. Lee, Drosophila Homolog of Human KIF22 at the  
15 Autism-Linked 16p11.2 Loci Influences Synaptic Connectivity at Larval Neuromuscular  
16 Junctions. *Exp Neurobiol* **25**, 33-39 (2016).
- 17 85. D. Haslinger *et al.*, Loss of the Chr16p11.2 ASD candidate gene QPRT leads to aberrant  
18 neuronal differentiation in the SH-SY5Y neuronal cell model. *Mol Autism* **9**, 56 (2018).
